# Supplementary figures and images for: Harnessing the lysosome-dependent antitumor activity of phenothiazines in human small cell lung cancer
Source: PubMed Central journal article supplement — Cell Death Dis. 2014 Mar 13;5(3):e1111–. doi: 10.1038/cddis.2014.56 (PMC3973193; doi:10.1038/cddis.2014.56), 2014-03-13

**A**

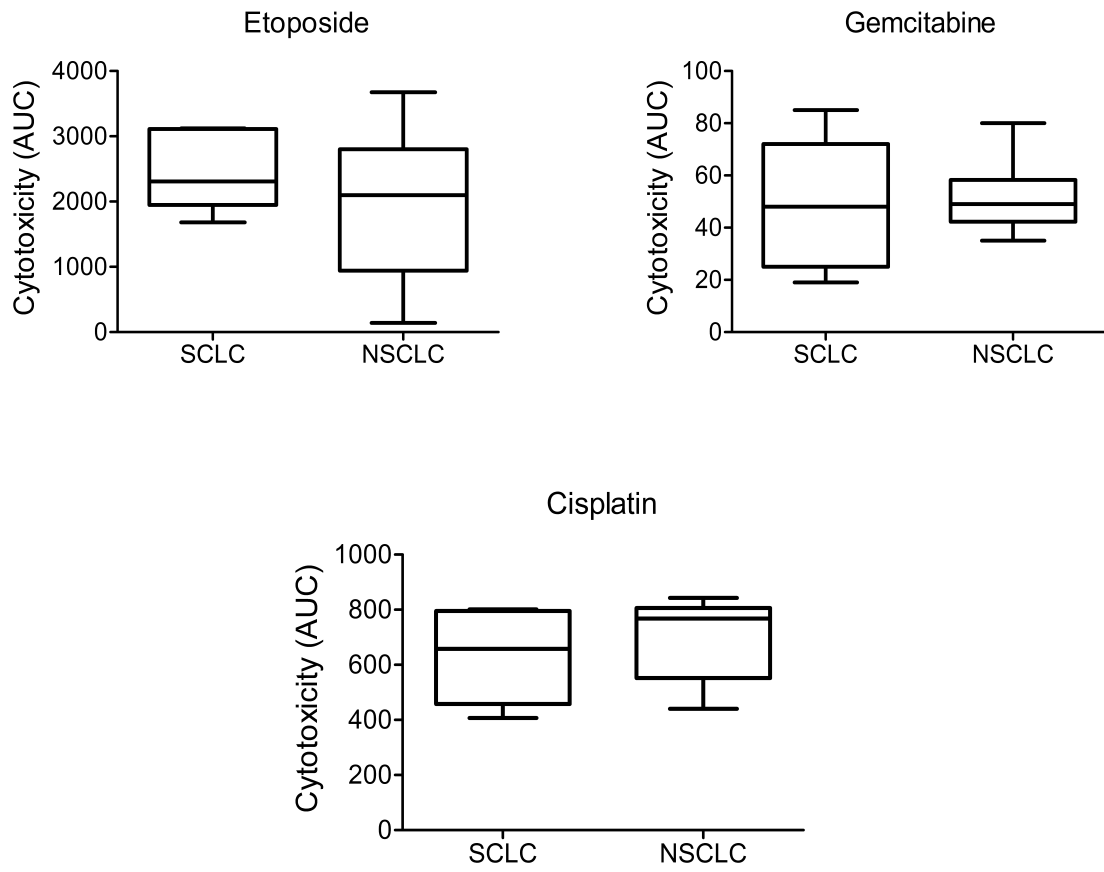

Supplement: cddis201456x1.pdf [file cddis201456x1.pdf]
